# Supplementary material for: Tumor Microenvironment in Mixed Neuroendocrine Non-Neuroendocrine Neoplasms: Interaction between Tumors and Immune Cells, and Potential Effects of Neuroendocrine Differentiation on the Tumor Microenvironment
Source: MDPI journal article supplement (doi:10.3390/cancers14092152), 2022-04-26
Supplement: s1 [file s1]

# Supplementary Materials: Tumor Microenvironment in Mixed Neuroendocrine Non-Neuroendocrine Neoplasms: Interaction between Tumors and Immune Cells, and Potential Effects of Neuroendocrine Differentiation on the Tumor Microenvironment

Junichi Tsunokake, Fumiyoshi Fujishima, Hirofumi Watanabe, Ikuro Sato, Koh Miura, Kazuhiro Sakamoto <sup>5</sup>, Hiroyoshi Suzuki, Takashi Sawai, Yuko Itakura, Tatsuya Hoshi, Atsushi Kunimitsu, Takuro Yamauchi, Ryujiro Akaishi, Yohei Ozawa, Toshiaki Fukutomi, Hiroshi Okamoto, Chiaki Sato, Yusuke Taniyama, Takashi Kamei and Hironobu Sasano

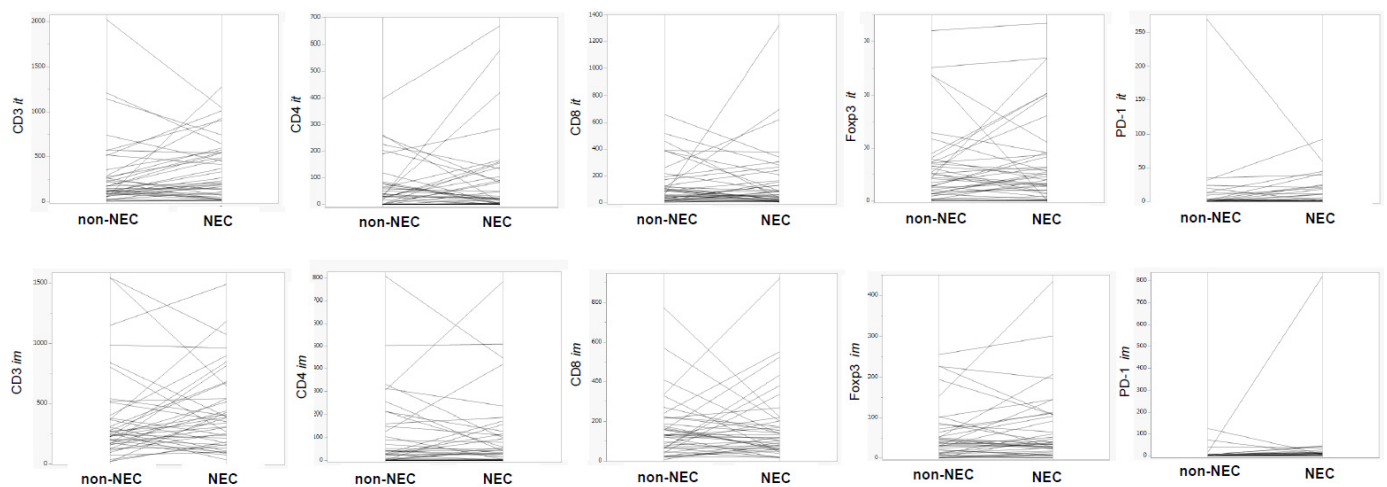

**Figure S1.** Graphs connecting the corresponding points for lymphocytes expressing specific markers in the NEC and non-NEC components in each case. \* it: intra-tumoral, im: invasive margin. NEC, neuroendocrine; non-NEC, non- neuroendocrine.

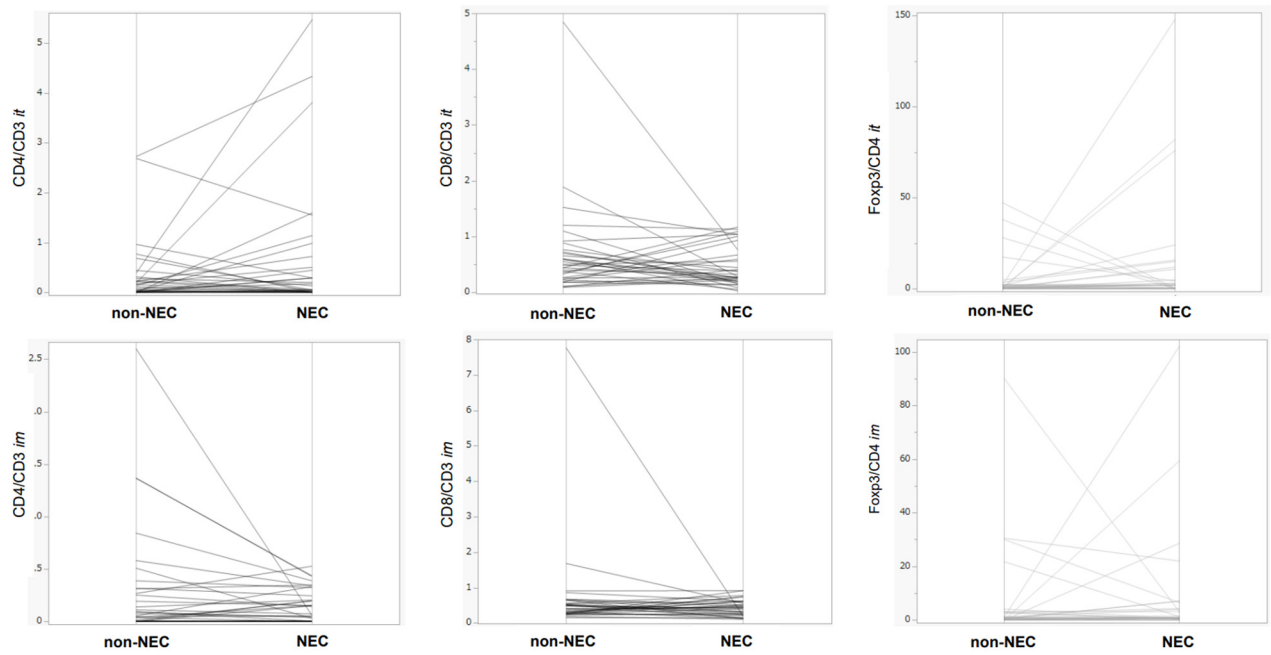

**Figure S2.** Graphs connecting the corresponding points for lymphocytes expressing specific markers in the NEC and non-NEC components in each case. \* *it*: intra-tumoral, *im*: invasive margin.

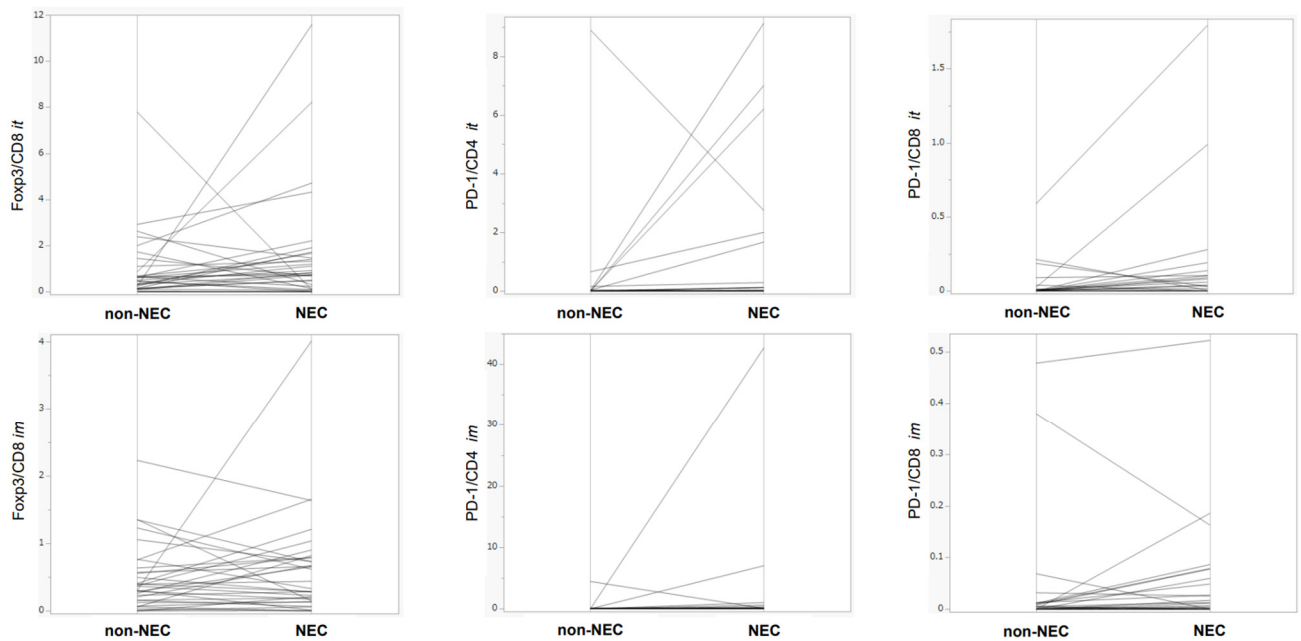

**Figure S3.** Graphs connecting the corresponding points for lymphocytes expressing specific markers in the NEC and non-NEC components in each case. \* *it*: intra-tumoral, *im*: invasive margin.

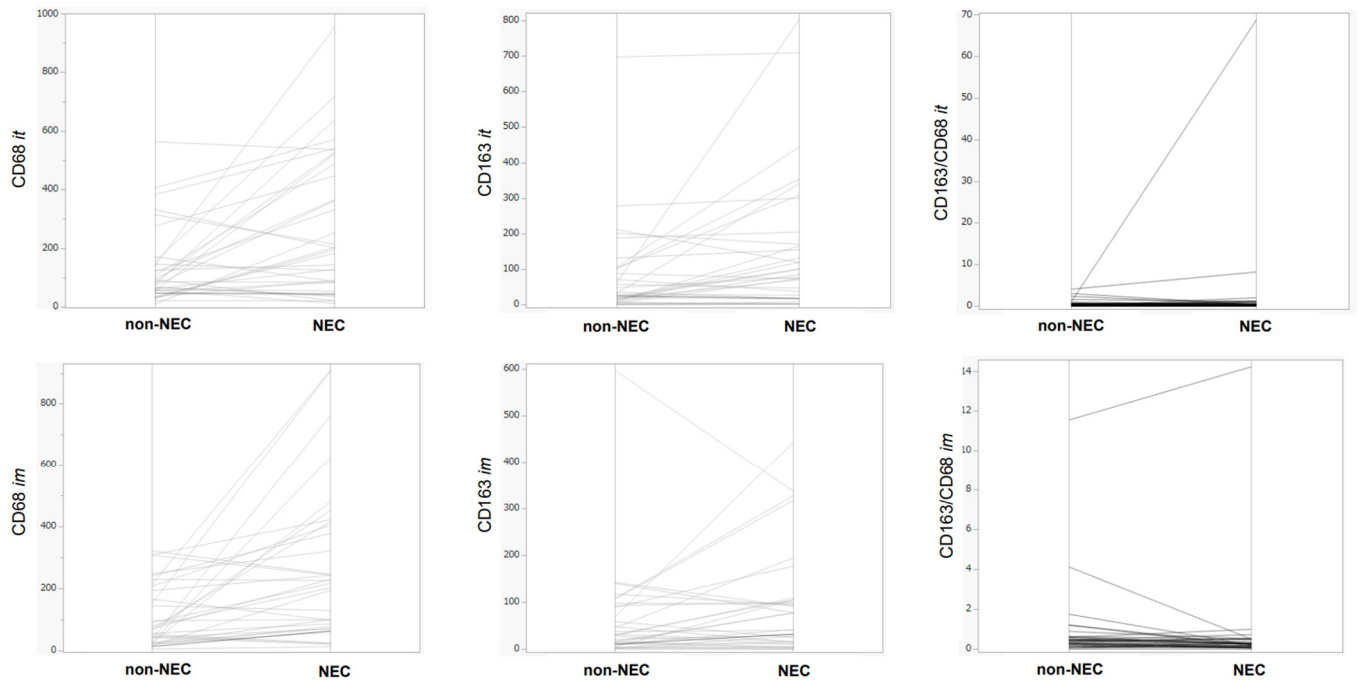

**Figure S4.** Graphs connecting the corresponding points for macrophages expressing specific markers in the NEC and non-NEC components in each case. \* it: intra-tumoral, im: invasive margin.

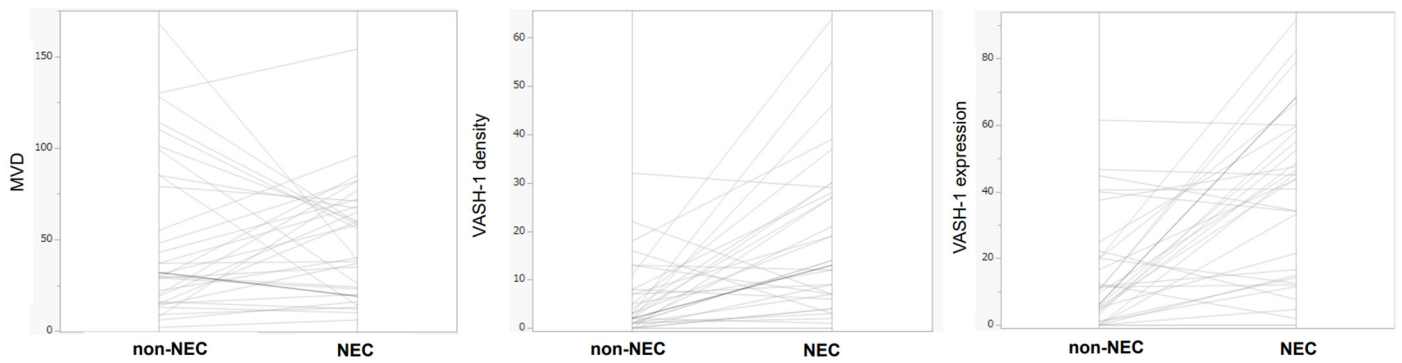

**Figure S5.** Graphs connecting the corresponding points for microvessels expressing specific markers in the NEC and non-NEC components in each case.

**Table S1.** The association between the number of lymphocytes infiltrating intra-tumoral areas and invasive margins in each case (NEC–non-NEC area) in relation to pN (+) and vessel invasion ( $\chi^2$  test). Only CD4 expression in the intra-tumoral areas and venous invasion in NECs were significantly more abundant than those in non-NECs ( $p = 0.0229$ ). NEC, neuroendocrine; non-NEC, non- neuroendocrine; pN, pathological cancer-positive lymph nodes.

| Antibodies | pN            |       |          |                 |       |          | Ly            |       |          |                 |       |          | V             |      |          |                 |      |          |
|------------|---------------|-------|----------|-----------------|-------|----------|---------------|-------|----------|-----------------|-------|----------|---------------|------|----------|-----------------|------|----------|
|            | intra-tumoral |       |          | invasive margin |       |          | intra-tumoral |       |          | invasive margin |       |          | intra-tumoral |      |          | invasive margin |      |          |
|            | pN(+)         | pN(-) | <i>p</i> | pN(+)           | pN(-) | <i>p</i> | Ly(+)         | Ly(-) | <i>p</i> | Ly(+)           | Ly(-) | <i>p</i> | V(+)          | V(-) | <i>p</i> | V(+)            | V(-) | <i>p</i> |
| CD3        |               |       |          |                 |       |          |               |       |          |                 |       |          |               |      |          |                 |      |          |
| high       | 9             | 8     | 0.5975   | 9               | 8     | 0.5975   | 11            | 6     | 0.6193   | 10              | 7     | 0.829    | 12            | 5    | 0.2264   | 11              | 6    | 0.6193   |
| low        | 7             | 9     |          | 7               | 9     |          | 9             | 7     |          | 10              | 6     |          | 8             | 8    |          | 9               | 7    |          |
| CD4        |               |       |          |                 |       |          |               |       |          |                 |       |          |               |      |          |                 |      |          |
| high       | 6             | 11    | 0.1181   | 8               | 5     | 0.2248   | 11            | 6     | 0.6193   | 8               | 5     | 0.9295   | 9             | 8    | 0.353    | 11              | 2    | 0.0229   |
| low        | 10            | 6     |          | 8               | 12    |          | 9             | 7     |          | 12              | 8     |          | 11            | 5    |          | 9               | 11   |          |
| CD8        |               |       |          |                 |       |          |               |       |          |                 |       |          |               |      |          |                 |      |          |
| high       | 6             | 11    | 0.5975   | 7               | 9     | 0.5975   | 9             | 8     | 0.358    | 9               | 7     | 0.6193   | 10            | 7    | 0.829    | 10              | 6    | 0.829    |
| low        | 10            | 6     |          | 9               | 8     |          | 11            | 5     |          | 11              | 6     |          | 10            | 6    |          | 10              | 7    |          |
| Foxp3      |               |       |          |                 |       |          |               |       |          |                 |       |          |               |      |          |                 |      |          |
| high       | 7             | 9     | 0.3921   | 7               | 10    | 0.3865   | 10            | 6     | 0.829    | 9               | 8     | 0.353    | 10            | 6    | 0.829    | 11              | 6    | 0.6193   |
| low        | 9             | 8     |          | 9               | 7     |          | 10            | 7     |          | 11              | 5     |          | 10            | 7    |          | 9               | 7    |          |
| PD-1       |               |       |          |                 |       |          |               |       |          |                 |       |          |               |      |          |                 |      |          |
| high       | 7             | 5     | 0.3921   | 8               | 7     | 0.6109   | 7             | 5     | 0.8399   | 9               | 6     | 0.9481   | 11            | 6    | 0.6193   | 8               | 4    | 0.5902   |
| low        | 9             | 12    |          | 8               | 10    |          | 13            | 8     |          | 11              | 7     |          | 9             | 7    |          | 12              | 9    |          |

**Table S2.** The association between the number of macrophages infiltrating the intra-tumoral areas and invasive margins and VASH-1 expression (NEC–non-NEC area) in relation to pN (+) and vessel invasion ( $\chi^2$  test). There were no significant differences between the components. VASH-1, vasohibin 1.

| Antibodies | pN            |       |          |                 |       |          | Ly            |       |          |                 |       |          | V             |      |          |                 |      |          |
|------------|---------------|-------|----------|-----------------|-------|----------|---------------|-------|----------|-----------------|-------|----------|---------------|------|----------|-----------------|------|----------|
|            | intra-tumoral |       |          | invasive margin |       |          | intra-tumoral |       |          | invasive margin |       |          | intra-tumoral |      |          | invasive margin |      |          |
|            | pN(+)         | pN(-) | <i>p</i> | pN(+)           | pN(-) | <i>p</i> | Ly(+)         | Ly(-) | <i>p</i> | Ly(+)           | Ly(-) | <i>p</i> | V(+)          | V(-) | <i>p</i> | V(+)            | V(-) | <i>p</i> |
| CD68       |               |       |          |                 |       |          |               |       |          |                 |       |          |               |      |          |                 |      |          |
| high       | 8             | 8     | 0.865    | 8               | 8     | 0.865    | 8             | 8     | 0.2264   | 11              | 5     | 0.353    | 8             | 8    | 0.2264   | 10              | 6    | 0.829    |
| low        | 8             | 9     | 8        | 8               | 9     | 8        | 12            | 5     |          | 9               | 8     |          | 12            | 5    |          | 10              | 7    |          |

|                   |   |   |       |   |   |       |    |   |        |    |   |   |    |   |        |    |   |
|-------------------|---|---|-------|---|---|-------|----|---|--------|----|---|---|----|---|--------|----|---|
| CD163             |   |   |       |   |   |       |    |   |        |    |   |   |    |   |        |    |   |
| high              | 8 | 8 | 0.865 | 9 | 8 | 0.597 | 10 | 6 | 0.829  | 12 | 8 | 1 | 8  | 8 | 0.2264 | 10 | 7 |
| low               | 8 | 9 | 8     | 7 | 9 | 5     | 10 | 7 | 0.829  | 12 | 8 | 1 | 12 | 5 | 0.2264 | 10 | 6 |
| VASH-1 density    |   |   |       |   |   |       |    |   |        |    |   |   |    |   |        |    |   |
| high              | — | — | —     | — | — | —     | 9  | 7 | 0.6193 | —  | — | — | 8  | 8 | 0.2264 | —  | — |
| low               | — | — | —     | — | — | —     | 11 | 6 | 0.6193 | —  | — | — | 12 | 5 | 0.2264 | —  | — |
| VASH-1 expression |   |   |       |   |   |       |    |   |        |    |   |   |    |   |        |    |   |
| high              | — | — | —     | — | — | —     | 8  | 8 | 0.2264 | —  | — | — | 7  | 9 | 0.0545 | —  | — |
| low               | — | — | —     | — | — | —     | 12 | 5 | 0.2264 | —  | — | — | 13 | 4 | 0.0545 | —  | — |
